# Supplementary material for: C5 deficiency and C5a or C5aR blockade protects against cerebral malaria
Source: PubMed Central journal article supplement — J Exp Med. 2008 May 12;205(5):1133–43. doi: 10.1084/jem.20072248 (PMC2373845; doi:10.1084/jem.20072248), 2008-05-12
Supplement: jem.20072248_2.pdf [file jem.20072248_2.pdf]

**Table S1.** Primers used in sequencing of the mouse Hc gene from genomic DNA

| Exons     | Forward primer                     | Reverse primer                  |
|-----------|------------------------------------|---------------------------------|
| 1         | 5'-CCCTCTTTGTCCATTTCTGA-3'         | 5'-TTCCACAGCTTCTCGTGTG-3'       |
| 2         | 5'-ACGGCTGGCTTGAAATTAT-3'          | 5'-TGGGGCACATTACAAAATCA-3'      |
| 3         | 5'-TGATTGCTAGGCTCAATGC-3'          | 5'-AAAACCCAAAATGCTATTTGAA-3'    |
| 4 and 5   | 5'-TGTCTGCAGTTTCTGATGATG-3'        | 5'-ACAATCAAGTGGAGCCACCT-3'      |
| 6         | 5'-GAATCTCTCACAAGATATTTACATGC-3'   | 5'-CCCCACCCTCTTCTGGTACT-3'      |
| 7 and 8   | 5'-AATGGTGATGATGGAGATGTGA-3'       | 5'-ACTGGAGGGTTGCGAGTAA-3'       |
| 9         | 5'-CAGACTGATCGTTTTCTGA-3'          | 5'-AAGCCTGCCTCTTTTACAGG-3'      |
| 10 and 11 | 5'-CGACCACCATCACCTTTC-3'           | 5'-TGGGTGCAAAATTATGGAAT-3'      |
| 12        | 5'-GGGTATGTCACACGCCAAC-3'          | 5'-TTGGACGAGCTTGAAATCT-3'       |
| 13 and 14 | 5'-TTTTGTCTCCAGCTCCAAAT-3'         | 5'-CTAAGGCAGCCCCCTTACTT-3'      |
| 15        | 5'-TGTATGAATGCCCGTGAAT-3'          | 5'-TGGGATAGGAATGATGTCTGG-3'     |
| 16        | 5'-GTCCTTTGCCCATGTTCTA-3'          | 5'-ATCGAGTGGGAAAGTCTCT-3'       |
| 17        | 5'-GAGTGAGGGGGTCCCTGAT-3'          | 5'-TCCTGAAAAGGGGTGAGCTA-3'      |
| 18        | 5'-TAAGCAATGCCTTCTGACC-3'          | 5'-TTTTGGCAATAATGCAGATTTT-3'    |
| 19        | 5'-CCAGGCATATCCAGAGGCTA-3'         | 5'-GTTGGCAGCCAGTAGAGGAG-3'      |
| 20        | 5'-CTCCTCTACTGGCTGCCAAC-3'         | 5'-TTAGCCTGCTCCCTTCTCTCT-3'     |
| 21        | 5'-TTCAGGGTGAACATATATAACATAACAA-3' | 5'-CCATGTTCTATTTATACCATCTTTC-3' |
| 22        | 5'-GGCAAAGTGGACTGGAGGAA-3'         | 5'-GAGTGCAAGGGGATGAGTTGT-3'     |
| 23        | 5'-ACGGGAGCAATGAACAAGAC-3'         | 5'-CCGTTTCTGATCTTCTCTGCT-3'     |
| 24 and 25 | 5'-GAGCAGATAGCGGGTGGTA-3'          | 5'-CCCCTGGCTGTTATTCTCAA-3'      |
| 26        | 5'-AAGCCAGGAGAGACTTGGTG-3'         | 5'-CTTGCTCTTGTGAGGGCATT-3'      |
| 27        | 5'-CAGGGCATGCTGTAGAAACA-3'         | 5'-CTATCTGCCCCAAGTTTGT-3'       |
| 28        | 5'-CGGGGAAGGAAAGGTAAGT-3'          | 5'-GCCAGTGCCTGTTGAGAACT-3'      |
| 29        | 5'-GAAGTGAGAGAGCCGTACC-3'          | 5'-CACGAACATGGATCAGGCTA-3'      |
| 30        | 5'-TCTCAAAAAGAAAGATGGGTCTG-3'      | 5'-CGGAAGGGATGACTTAAACA-3'      |
| 31        | 5'-GTGCAGATCTCAATGTCATCC-3'        | 5'-TGGAGGGCATGTACTCATGT-3'      |
| 32        | 5'-TTGGCCAAGAGTCATCATTTG-3'        | 5'-CACTCTCTCCTTGGCGTTTT-3'      |
| 33        | 5'-CAGATCCCCAAAAGCATTGC-3'         | 5'-CATCTACCACCAGCACCAGA-3'      |
| 34-36     | 5'-TGCTAAGTAGCAGGGCCTTT-3'         | 5'-AGCAGGGTCTTCAGGGAAC-3'       |
| 37 and 38 | 5'-CCATCTCTGAGGCCTCTTGT-3'         | 5'-CCACGAGTGTGAGTGTCTT-3'       |
| 39        | 5'-GGGAAGGAAGATCCTTGGAA-3'         | 5'-CTGCGATAAGAGCATTTCAG-3'      |
| 40        | 5'-TCTGGCTCCAGAGTCTCAGTC-3'        | 5'-GATTCACCTTGTCTGGTCA-3'       |
| 41        | 5'-TCACCTGCTGGCAACTTCTA-3'         | 5'-AGCAAAGGGCTTCTGTCA-3'        |

**Table S2.** Primers used in real-time RT-PCR C5 detection of mRNA levels

| Exon  | Forward primer                  | Reverse primer                 |
|-------|---------------------------------|--------------------------------|
| C5    | 5'-TACCAATGCCAACCTGGTGAAGG-3'   | 5'-TCTGCAGAACCTCTTGGCCATGA-3'  |
| GAPDH | 5'-TCAACAGCAACTCCCACTCTTCCA-3'  | 5'-TTGTCATTGAGAGCAATGCCAGCC-3' |
| HPRT  | 5'-GGAGTCCCTGTTGATGTTGCCAGTA-3' | 5'-GGGACGCAGCAACTGACATTTCTA-3' |
| SDHA  | 5'-TCACGTCTACCTGCAGTTGCATCA-3'  | 5'-TGACATCCACACCAGCGAAGATCA-3' |
| YWHAZ | 5'-AGCAGGCAGAGCGATATGATGACA-3'  | 5'-TCCCTGCTCAGTGACAGACTTCAT-3' |
